# Supplementary material for: Characteristics of Temporal and Spatial Changes in Ozone and PM2.5 and Correlation Analysis in Heilongjiang Province
Source: MDPI journal article supplement (doi:10.3390/atmos14101526), 2023-10-02
Supplement: s1 [file s1]

# Characteristics of Temporal and Spatial Changes in Ozone and PM<sub>2.5</sub> and Correlation Analysis in Heilongjiang Province

Lichun Xuan <sup>1,†</sup>, Lei Li <sup>2,†</sup>, Pengjie Wang <sup>2,\*</sup>, Yanfeng Xing <sup>2</sup>, Chengcheng Feng <sup>2,\*</sup> and Rui Zhang <sup>2</sup>

<sup>1</sup> School of Chemistry and Materials Science, Heilongjiang University, Harbin 150080, China; 2002069@hlju.edu.cn

<sup>2</sup> Heilongjiang Ecological Environment Monitoring Center, Harbin 150056, China; hljemcll@126.com (L.L.); hljemcxyf@126.com (Y.X.); geigei\_00@163.com (R.Z.)

\* Correspondence: wpj\_19900915@126.com (P.W.); zoefeng1987@foxmail.com (C.F.)

† These authors contributed equally to this work and should be regarded as co-first authors.

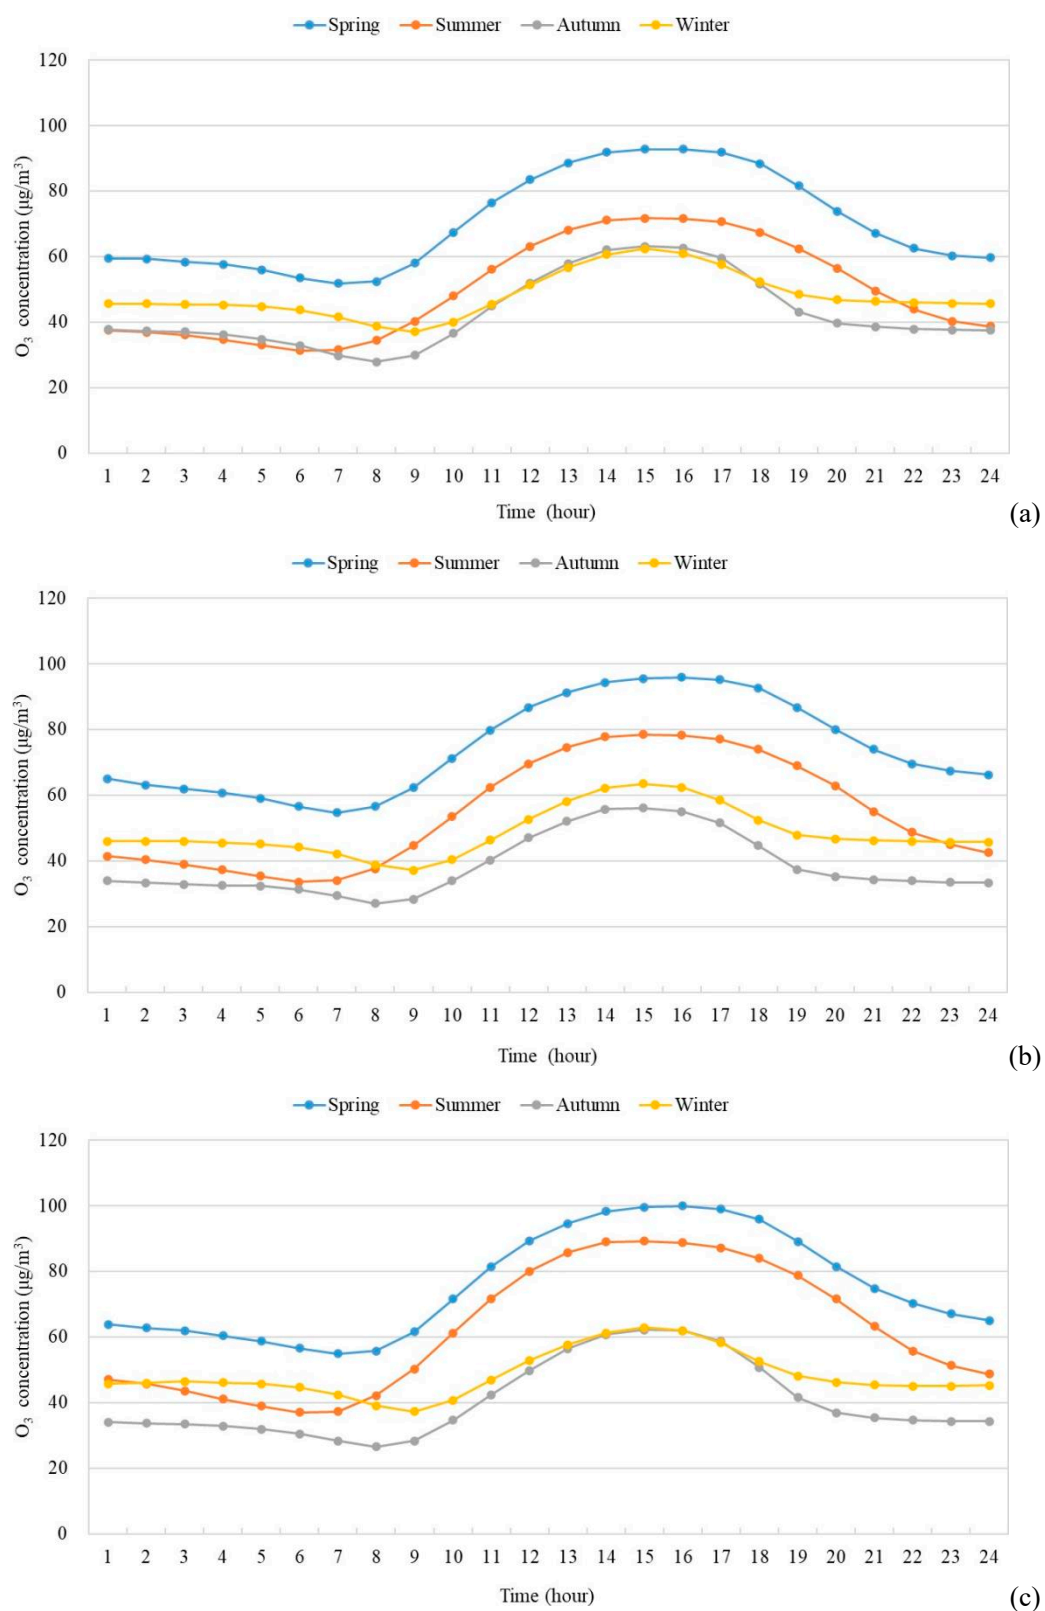

**Figure.S1.** Trends in monthly mean concentrations of O<sub>3</sub> in 13 cities in Heilongjiang Province in 2019 (a), 2020 (b) and 2021 (c)

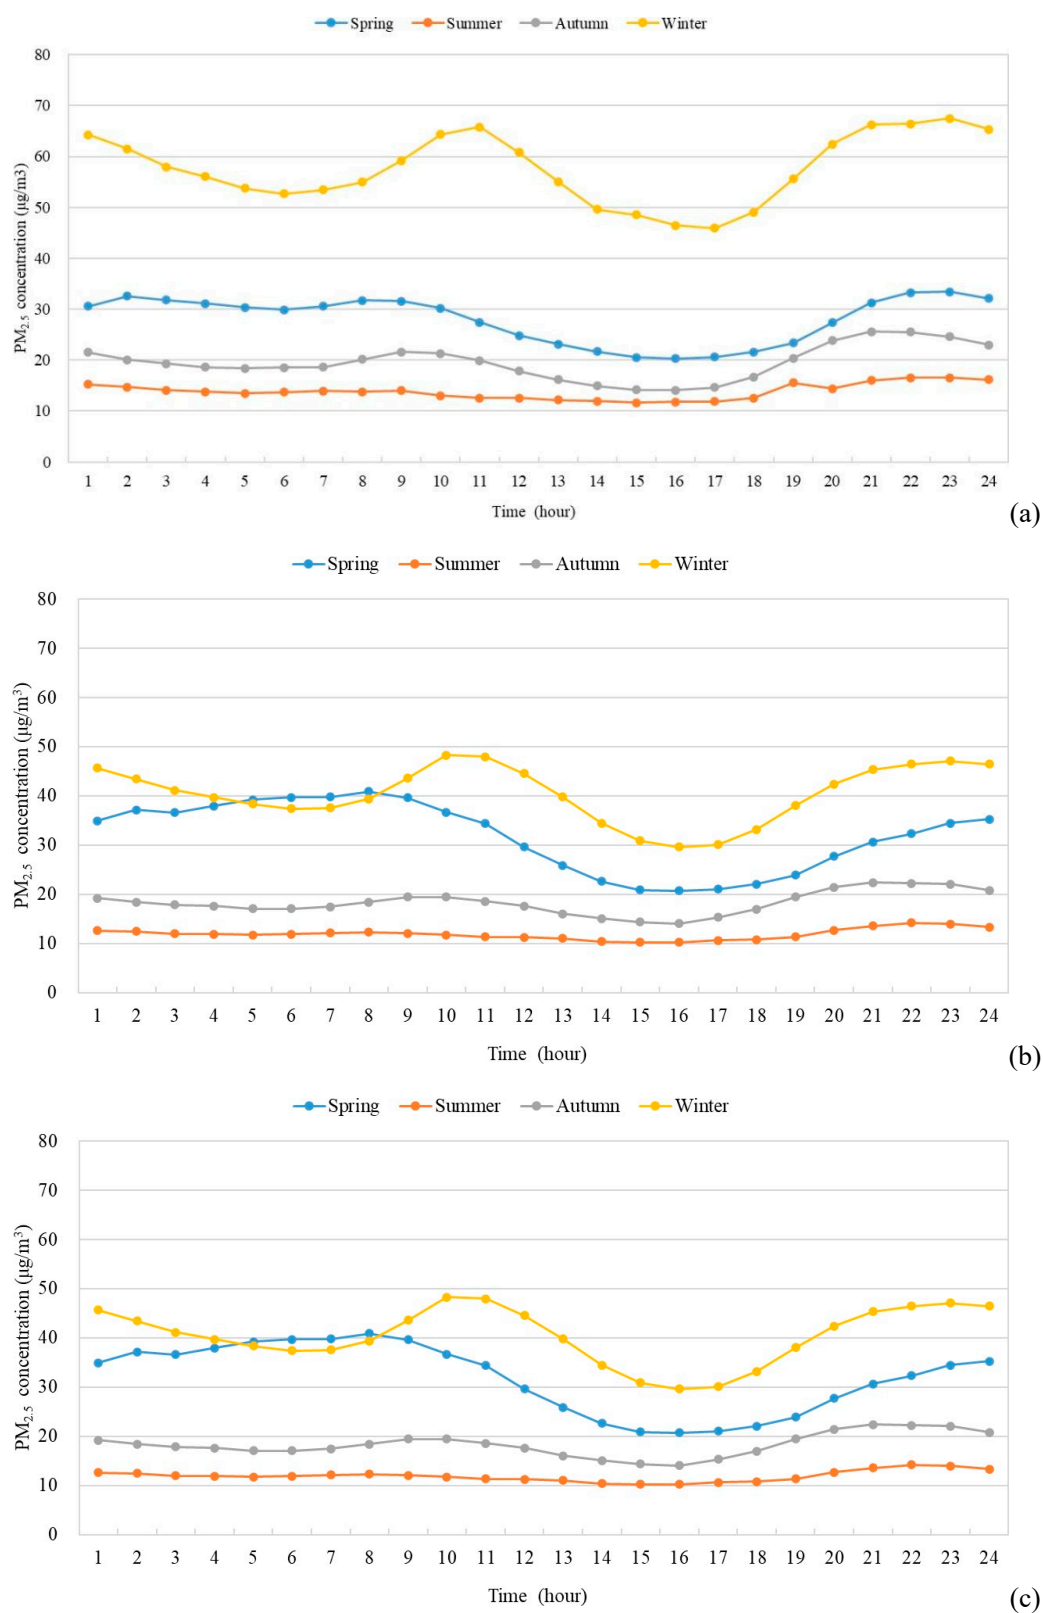

**Figure.S2.** Trends in monthly mean concentrations of PM<sub>2.5</sub> in 13 cities in Heilongjiang Province in 2019 (a), 2020 (b) and 2021 (c)
